# Supplementary material for: Tunable bioelectrodes with wrinkled-ridged graphene oxide surfaces for electrochemical nitrate sensors
Source: Royal Society of Chemistry journal article supplement (doi:10.1039/c6ra09621b), 2016-01-01
Supplement: c6ra09621b1.pdf [file c6ra09621b1.pdf]

## Supporting Information

### Tunable bioelectrodes with wrinkled-ridged graphene oxide surfaces for electrochemical nitrate sensors

Md. Azahar Ali,<sup>1</sup> Wei Hong,<sup>2</sup> Seval Oren,<sup>1</sup> Qiugu Wang,<sup>1</sup> Yifei Wang,<sup>1</sup> Huawei Jiang,<sup>1</sup> and Liang Dong<sup>1,\*</sup>

<sup>1</sup>Department of Electrical and Computer Engineering, Iowa State University, Ames, IA, 50011

<sup>2</sup>Department of Aerospace Engineering, Iowa State University, Ames, IA, 50011

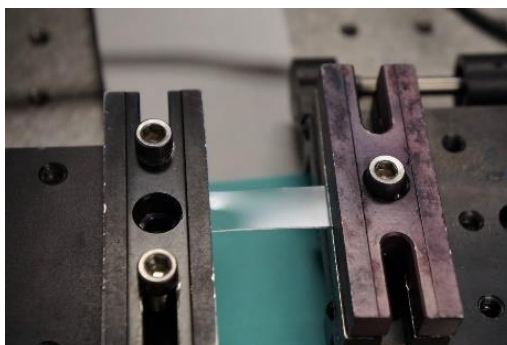

**Figure S1.** A homemade stretcher setup for pre-stretching PDMS substrate.

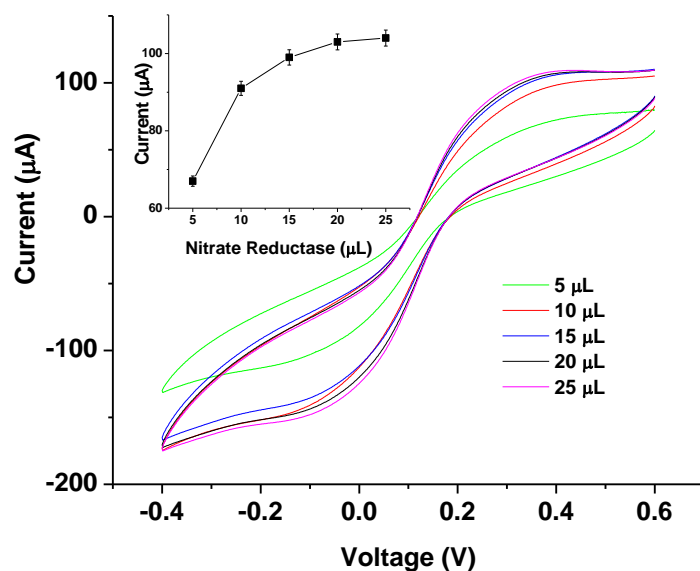

**Figure S2.** CV curves for NiR/GO-Au-PDMS bioelectrode (pre-stretch: 8.0%; scan rate: 10 mV/s) by varying the volume of enzyme solution (3.5 mg/mL) during enzyme immobilization. Inset summarizes the peak current as a function of volume of enzyme solution drop-coated on the electrode. Specifically, to optimize amount of enzyme molecules covalently immobilized on the fabricated electrodes and investigate enzyme activity, we drop-coated the electrode surface with different volumes of PBS solution containing enzyme molecules (3.5 mg/mL), and then conducted cyclic voltammetry (CV) studies for the formed bioelectrodes (pre-stretch: 8.0%) in presence of nitrate ions at scan rate of 10 mV/s. The peak current increased with increasing volume of enzyme molecules, due to availability of more enzyme active sites for more catalytic conversion with nitrate ions. The peak current was saturated at 20 µL volume of enzyme solution. The saturation of current may be due to an optimum level of catalytic reactions between the enzyme and nitrate ions where all enzyme molecules on the electrode surface were involved in the reactions.

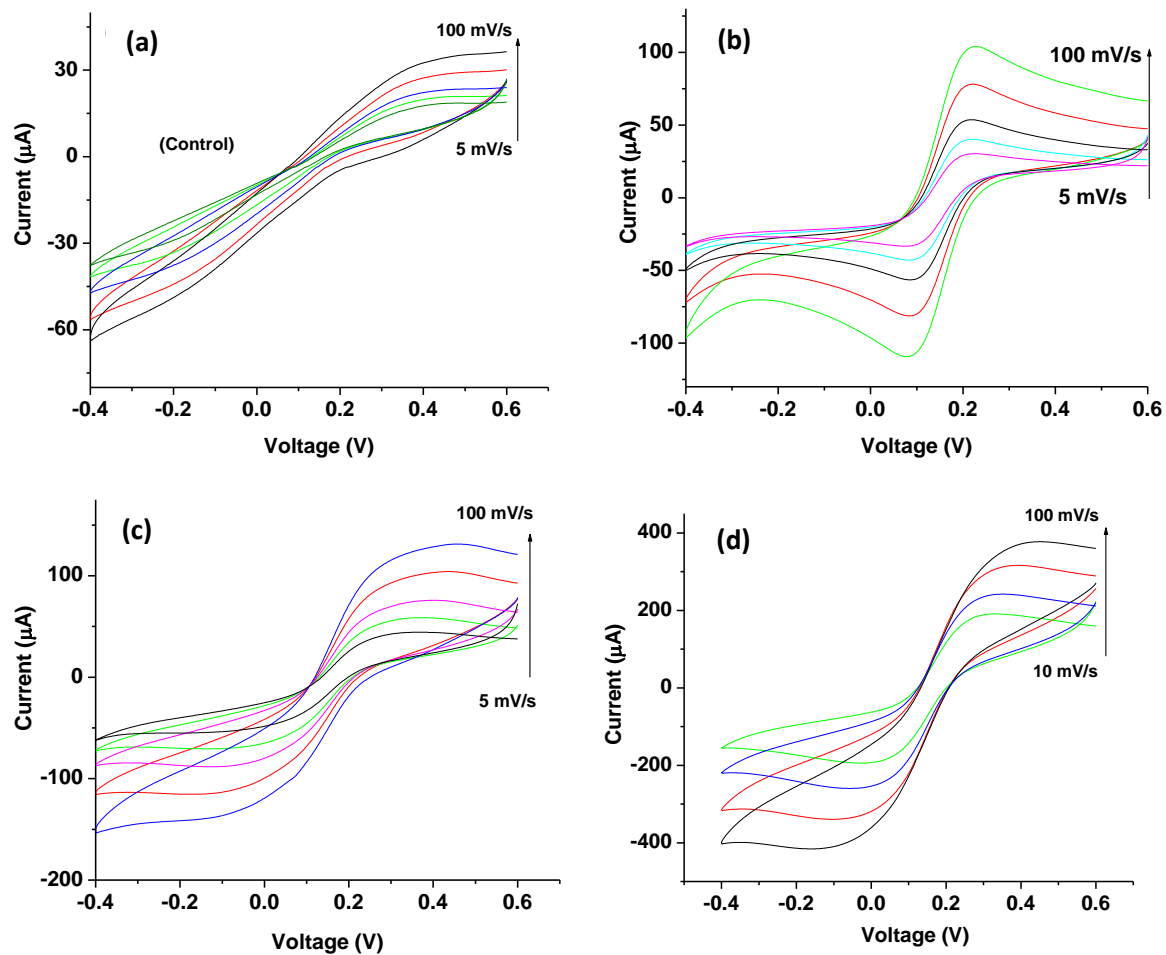

**Figure S3.** Scan rate studies for various NiR/GO-Au bioelectrodes in presence of PBS solution (50 mM, pH 7.0, 0.9 % NaCl) containing 5 mM  $[\text{Fe}(\text{CN})_6]^{3-/4-}$  redox probe with different pre-stretch values: (a) 0%, control), (b) 2.7 %, (c) 5.1 %, and (d) 8 %. The scan rate was varied from 5 to 100 mV/s.

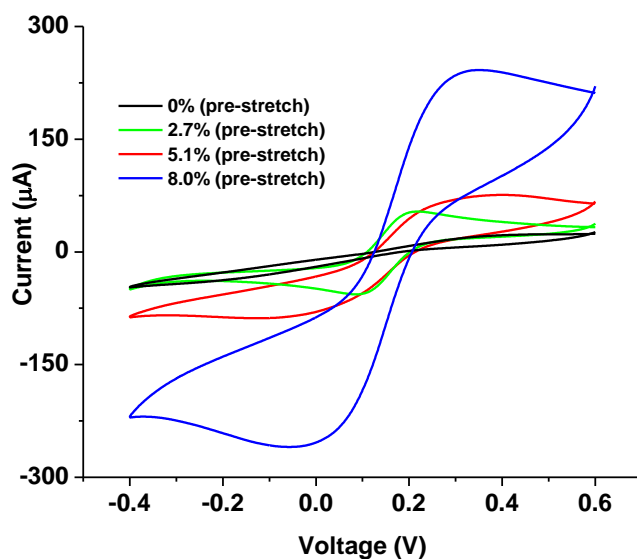

**Figure S4.** CV curves for various NiR/GO-Au bioelectrodes in presence of PBS solution (50 mM, pH 7.0, 0.9 % NaCl) containing 5 mM  $[\text{Fe}(\text{CN})_6]^{3-/4-}$  redox probe with different pre-stretch values: 0 % (control), 2.7 %, 5.1 %, and 8.0 % at scan rate of 20 mV/s.

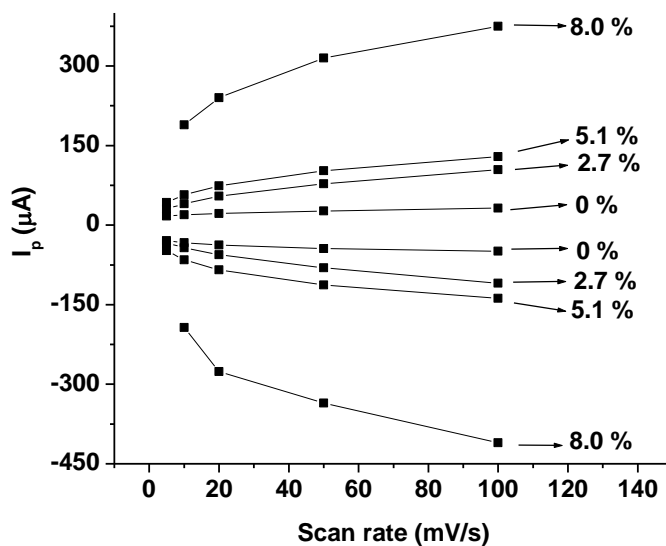

**Figure S5.**  $I_p$  as a function of scan rates for various NiR/GO-Au bioelectrodes with different pre-stretch values: 0% (control), 2.7 %, 5.1 %, and 8.0 %. The scan rate was varied from 5 to 100 mV/s.

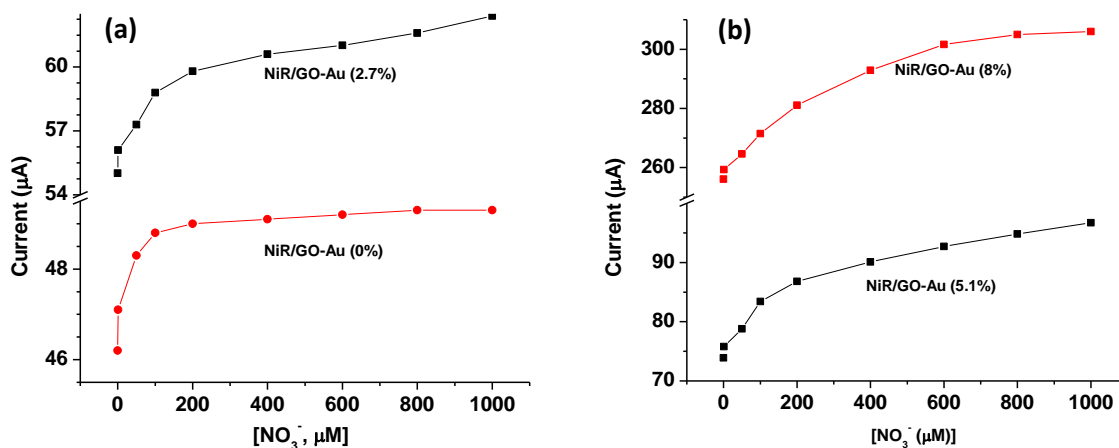

**Figure S6.** Sensing performances for all the fabricated NiR/GO-Au bioelectrodes at different pre-strains: (a) 0 % and 2.7 % and (b) 5.1 % and 8%.

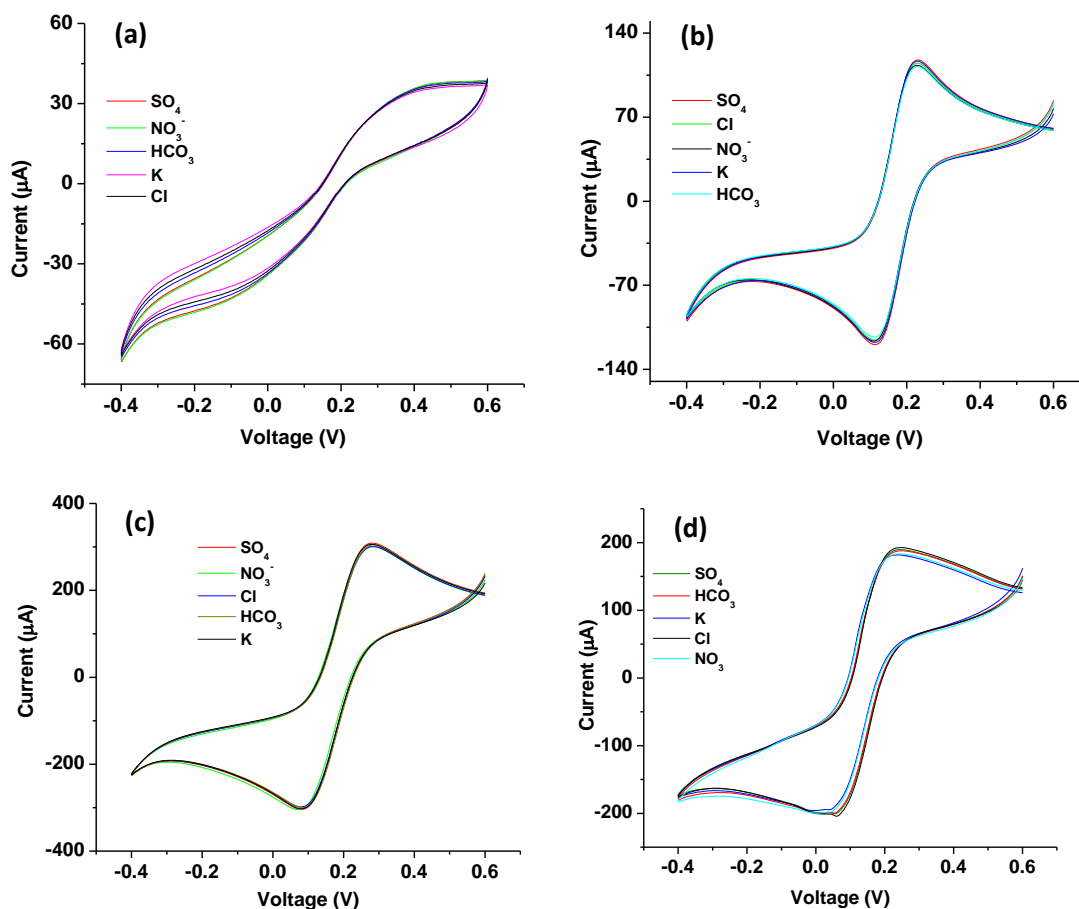

**Figure S7.** Selectivity studies of all the fabricated NiR/GO-Au bioelectrodes in presence of nitrate ions and various interfering ions at the scan rate of 20 mV/s. Different pre-strains were applied to the bioelectrodes, including (a) 0 %, (b) 2.7 %, (c) 5.1 %, and (d) 8.0%.
